# Supplementary material for: Lack of guilt, shame, and remorse following weight stigma expression: a real-time assessment pilot study
Source: PeerJ. 2020 Dec 22;8:e10294. doi: 10.7717/peerj.10294 (PMC7761191; doi:10.7717/peerj.10294)
Supplement: Supplemental Information 1 [file peerj-08-10294-s004.xlsx]

## Sheet: ExperienceSampling_vars
Variable Name	Label/Description	Value Range (if applicable)	Type (created or measure)	Coding (if applicable)
id	Participant ID	NA	generated by ESM Capture
datetime	Date and Time that participant responded to the phone prompt	Oct to Dec 2016	generated by ESM Capture
date	Date portion of phone prompt response; derived from datetime	Oct to Dec 2016	created
time	Time of day portion of phone prompt response; derived from datetime		created
expday	count for which day during the experimental period the prompt was sent (1 = Day 1, 2 = Day 2)		created
resp	running count of responses during the experiment time period (within subject)		created
resp_day	numbered count of responses during that day of the experiment period (within subject) (1 = first resp for that day, 2 = second response for that day)		created
startdate	Day the participant was enrolled in the phone prompts		generated by ESM Capture
firstrec	First time that a participant completed a phone prompt during the study		created
wt_stig_2	Excluded someone from a photograph because of their size.(Behavior)	0, 1	measured
wt_stig_3	Avoided posting a picture with a [friend, colleague, family member] on social media because they were over-weight or obese. (Behavior)	0, 1	measured
wt_stig_4	Avoided taking a picture with a [friend, colleague, family member] on social media because they were over-weight or obese. (Behavior)	0, 1	measured
wt_stig_5	Referred to someone as lazy or unmotivated (with or without them knowing) because of their size. (Behavior)	0, 1	measured
wt_stig_6	Ignored someone because of their size. (Behavior)	0, 1	measured
wt_stig_7	Saw someone overweight and felt bad for them. (Cognition)	0, 1	measured
wt_stig_8	Avoided socializing with someone because of their weight. (Behavior)	0, 1	measured
wt_stig_9	Felt uncomfortable when interacting with someone obese. (Cognition)	0, 1	measured
wt_stig_10	Saw someone as less sexually attractive because of their weight. (Cognition)	0, 1	measured
wt_stig_11	Ashamed to be seen with someone because of their weight. (Cognition)	0, 1	measured
wt_stig_12	Made fun of someones weight on social media. (Behavior)	0, 1	measured
wt_stig_13	Made a fat person joke/comment on social media. (Behavior)	0, 1	measured
wt_stig_14	Made fun of someones weight. (Behavior)	0, 1	measured
wt_stig_15	Judged someone because of their weight. (Cognition)	0, 1	measured
wt_stig_16	Stared at someone because of their weight. (Behavior)	0, 1	measured
wt_stig_17	Blamed something for someone because of their weight. (Cognition)	0, 1	measured
wt_stig_18	Called someone a name because of their weight. (Behavior)	0, 1	measured
wt_stig_19	Suggested a diet to someone because of their weight. (Behavior)	0, 1	measured
wt_stig_20	Nagged someone to lose weight. (Behavior)	0, 1	measured
wt_stig_21	Had low expectations about someone because of their weight. (Cognition)	0, 1	measured
wt_stig_22	Laughed at someone because of their weight. (Behavior)	0, 1	measured
wt_stig_23	Teased someone because of their weight. (Behavior)	0, 1	measured
wt_stig_24	Grimaced at someone because of their weight. (Behavior)	0, 1	measured
wt_stigma_total	sum of reported weight stigma behaviors at that time point	range 0 - 18	created
panas_1	Determined	1 to 5	measured
panas_6	Afraid	1 to 5	measured
panas_2	Attentive	1 to 5	measured
panas_7	Nervous	1 to 5	measured
panas_3	Alert	1 to 5	measured
panas_8	Upset	1 to 5	measured
panas_4	Inspired	1 to 5	measured
panas_9	Hostile	1 to 5	measured
panas_5	Active	1 to 5	measured
panas_10_shame	Ashamed	1 to 5	measured
mood_guilt	Guilty	1 to 5	measured
ssgs_1	I feel good about myself	1 to 5	measured
ssgs_2	I want to sink into the floor and disappear	1 to 5	measured
ssgs_3_remorse_regret	I feel remorse, regret.	1 to 5	measured
ssgs_4	I feel worthwhile, valuable	1 to 5	measured
ssgs_5	I feel small	1 to 5	measured
ssgs_6	I feel tension about something I have done	1 to 5	measured
ssgs_7	I feel capable, useful.	1 to 5	measured
ssgs_8	I feel like I am a bad person	1 to 5	measured
ssgs_9	I cannot stop thinking about something bad I have done	1 to 5	measured
ssgs_10_proud	I feel proud	1 to 5	measured
ssgs_11	I feel humiliated, disgraced	1 to 5	measured
ssgs_12	I feel like apologizing, confessing	1 to 5	measured
ssgs_13	I feel pleased about something I have done	1 to 5	measured
ssgs_14	I feel worthless, powerless	1 to 5	measured
ssgs_15_feel_bad	I feel bad about something I have done	1 to 5	measured
wtstig	any wt. stig endorsement	0, 1	measured
cumtime	cumulative amount of time (in hours) since the participant began the experiment		created
wtstignow	Yes = 1/No = 0 for if participant endorsed a wt stigma thought/behavior in their phone prompt response	0, 1	created
wtstignow_sum	sum of time points during an experiment day that the participant endorsed a weight stigma thought/behavior (4 = at 4 time points during that experiment day, the participant endorsed at least 1 wt stigma behav/thought)		created
wtstigDay	Yes = 1/No = 0 for if a weight stigma behavior/thought was reported at ANY time point during that experiment day		created
FIRWTSTIG	Yes = 1/No = 0 for if this is the first phone prompt of the day where a participant reported perpetrating weight stigma (endorsed a weight stigma thought/behavior)	0, 1	created
SECWTSTIG	Yes = 1/No = 0 for if this is the second phone prompt of the day where a participant reported perpetrating weight stigma (endorsed a weight stigma thought/behavior)	0, 1	created
wtstighour	hour at which the participant reported perpetuating weight stigma in their phone prompt response (referenced to the cumulative time variable)		created
wtstighour_sum	this variable auto-fills the timepoints before and after the reported weight stigma event with the hour at which it was reported; variable is then used to calculate the linear, quadratic, and cubic components		created
WTSTIGTIME	represents the linear component of GEE analysis (.00 is the time at which participant reported the weight stigma and the values at time points before and after represent the number of hours before/after the reported event)		created
WTSTIGTIME2	represents the quadratic component of GEE analysis (linear component squared)		created
WTSTIGTIME3	represents the cubic component of GEE analysis (linear component cubed)		created
wt_stig_cognitions	sum of weight stigma cognitions	0 to 7	created
wt_stig_behaviors	sum of weight stigma behaviors	0 to 13	created
ssgs_shame	composite subscale of shame items (Items 2, 5, 8, 11, 14) - summed	5 to 25	created
ssgs_guilt	composite subscale of guilt items (Items 3, 6, 9, 12, 15) - summed	5 to 25	created
ssgs_pride	composite subscale of pride items (Items 1, 4, 7, 10, 13) - summed	5 to 25	created
pos_aff_panas	composite of determined, attentive, alert, inspired, active - summed	5 to 25	created
neg_aff_panas	composite of upset, hostile, ashamed, afraid, nervous - summed	5 to 25	created

## Sheet: Baseline_vars
Variable Name	Label/Description	Value Range	Type (created or measure)	Coding (if applicable)
ID	Assigned participant ID/ID code	NA	generated by ESM Capture
StartDate	Date started baseline survey	Sept to Nov 2016	generated by ESM Capture
ESMnumber	ID assigned by ESMcapture (experience sampling data collection platform)		generated by ESM Capture
Total_ema_WtStig	Summed weight stigma frequency collected through experience sampling		created - calculated from experience sampling dataset
total_wt_stig_cogs	summed total of weight stigma cognitions reported during the study period		created - calculated from experience sampling dataset
total_wt_stig_behav	summed total of weight stigma behaviors reported during the study period		created - calculated from experience sampling dataset
gender	participants selected the gender they identified with most	1, 2	measured	1 = male 2 = female
age	Participant age		measured
race	race		measured	1 = White 2 = Asian 3 = Hispanic 4 = Black/African American 5 = Other/Mixed
country_born_usa_or_other	dichotomous variable representing country of birth		created	0 = born in US 1 = born outside US
height_in	reported height in inches		measured
height_cm	height converted to centimeters		created
weight_lbs	reported weight in pounds		measured
weight_kg	weight converted from kiligrams		created
bmi	Body mass index calculated by self reported weight and height	Formula: weight (kg) / [height (m)]2 BMI is weight in kilograms divided by height in meters squared. If height has been measured in centimeters, divide by 100 to convert this to meters.	created
atop_1	Obese people are as happy as non-obese people.	range -3 to 3	measured
atop_2	Most obese people feel that they are not as good as other people.	range -3 to 3	measured
atop_3	Most obese people are more self-conscious than other people.	range -3 to 3	measured
atop_4	Obese workers cannot be as successful as other workers.	range -3 to 3	measured
atop_5	Most non-obese people would not want to marry anyone who is obese.	range -3 to 3	measured
atop_6	Severely obese people are usually untidy.	range -3 to 3	measured
atop_7	Obese people are usually sociable.	range -3 to 3	measured
atop_8	Most obese people are not dissatisfied with themselves	range -3 to 3	measured
atop_9	Obese people are just self-confident as other people	range -3 to 3	measured
atop_10	Most people feel uncomfortable when they associate with obese people.	range -3 to 3	measured
atop_11	Obese people are often less aggressive than non-obese people.	range -3 to 3	measured
atop_12	Most obese people have different personalities than non-obese people.	range -3 to 3	measured
atop_13	Very few obese people are ashamed of their weight.	range -3 to 3	measured
atop_14	Most obese people resent normal weight people.	range -3 to 3	measured
atop_15	Obese people are more emotional than non-obese people	range -3 to 3	measured
atop_16	Obese people should not expect to lead normal lives	range -3 to 3	measured
atop_17	Obese people are just as healthy as non-obese people	range -3 to 3	measured
atop_18	Obese people are just as sexually attractive as non-obese people	range -3 to 3	measured
atop_19	Obese people tend to have family problems	range -3 to 3	measured
atop_20	One of the worst things that could happen to a person would be for him to become obese	range -3 to 3	measured
atop_total	Attitudes Toward Obese Persons total score - scaled from -3 to 3, 2-6, 10-12, 14-16, 19-20 multiplied by -1 for reverse scoring; add up responses to all items; add 60 to the sum, higher scores indicate more positive attitudes toward obese people	0 to 120	created
afa_1	I really don't like fat people much.	1 to 9	measured
afa_2	I dont have many friends that are fat.	1 to 9	measured
afa_3	I tend to think that people who are overweight are a little untrustworthy	1 to 9	measured
afa_4	Although some fat people are surely smart, in general, I think they tend not to be quite as bright as normal weight people	1 to 9	measured
afa_5	I have a hard time taking fat people too seriously	1 to 9	measured
afa_6	Fat people make me somewhat uncomfortable	1 to 9	measured
afa_7	If I were an employer looking to hire, I might avoid hiring a fat person	1 to 9	measured
afa_8	I feel disgusted with myself when I gain weight.	1 to 9	measured
afa_9	One of the worst things that could happen to me would be if I gained 25 lbs	1 to 9	measured
afa_10	I worry about becoming fat	1 to 9	measured
afa_11	People who weight too much could lose at least some part of their weight through a little exercise	1 to 9	measured
afa_12	Some people are fat because they have no willpower	1 to 9	measured
afa_13	Fat people tend to be fat pretty much through their own fault	1 to 9	measured
afa_dislike	Qs - 1-7, Sum scores of items 1,2,3,4,5,6,7, and divide by number of items in scale to obtain average		created
afa_fear	Qs - 8-10, Sum scores of items 8,9,10 and divide by number of items in scale to obtain average		created
afa_willpower	Qs 11-13, Sum scores of items 11,12,13 and divide by number of items in scale to obtain average		created
afa_total	Average of AFA subscales		created
